# Supplementary material
Source: PubMed Central journal article supplement (PMC2151684)
Supplement: plntphys_pp.107.108076_1.pdf [file plntphys_pp.107.108076_1.pdf]

```

PMH1 MISTVLRRLRSILGTSRRTLAASVTSINAALFHNLAAPAAATVSDLAN-GATNVKSLPSNSSP 59
PMH2 MITTVLRRLSLLDASKRNLSASLTSINTVLFHNLAAPAAATRVSDLALIGSSDVKAG----FP 56
** ***** * * * * * ***** ***** * ** *

PMH1 FGVKVRDFHVKSVPSEFRSSIVSSAGFAAQEYAPSYENDGGIGDSESVGSSGGDGLAIA 119
PMH2 FGVEAKGIHFQSGPLDFRASMVSQAGFAISESS-----ERRVGDSESVG----GDGLAIS 107
*** * * * * * * * * * * * * * * * * * * * * * * * * * * * * * * * * * * * * * * * * *

          Q                               I
PMH1 DLGISPEIVKALKGRGIEKLFPIQKAVLEPAMEGRDMIGRARTGTGKTLAFGIPIIDKII 179
PMH2 ELGISPEIVKALSSKIEKLFPIQKAVLEPAMEGRDMIGRARTGTGKTLAFGIPIIDKII 167
***** * * * * * * * * * * * * * * * * * * * * * * * * * * * * * * * * * * * * * * * * *

          Ia
PMH1 KFNAXHGRGKNPQCLVLAPTRELARQVEKEFRESAPSLDTICLYGGTPIGQQMRELNYGI 239
PMH2 KYNAXHGRGRNPLCLVLAPTRELARQVEKEFRESAPSLDTICLYGGTPIGQQMRQLDYGV 227
* ***** * * * * * * * * * * * * * * * * * * * * * * * * * * * * * * * * * * * * * * * * *

          Ib                               II
PMH1 DVAVGTPGRVIDLMKRGALNLSVQFVVIIDQMLQVGFADVEIILQKLPKARQSMVF 299
PMH2 DVAVGTPGRVIDLMKRGALNLSVQFVVIIDQMLQVGFADVEIILEKLPEKARQSMVF 287
***** * * * * * * * * * * * * * * * * * * * * * * * * * * * * * * * * * * * * * * * * *

          III
PMH1 SATMPSWIRSLTKKYLNNPLTIDLVDSDQKLDGITMYSIAADSYGRASIIIGPLVKEHG 359
PMH2 SATMPSWIRSLTKKYLNNPLTVDLVDSDQKLDGITTYSIIADSYGRASIIIGPLVTEHA 347
***** * * * * * * * * * * * * * * * * * * * * * * * * * * * * * * * * * * * * * * * * *

PMH1 KGGKCI VFTQTKRDADRLAFGLAKSYKCEALHGDISQAORERTLAGFRDGNFISILVATDV 419
PMH2 KGGKCI VFTQTKRDADRLSYALARSFKCEALHGDISQSQRERTLAGFRDGHFNILVATDV 407
***** * * * * * * * * * * * * * * * * * * * * * * * * * * * * * * * * * * * * * * * * *

          V                               VI
PMH1 AARGLDVVPNVDLVIHYELPNNTEFVHRTGRTGRAGKKGSAILI HQDQTRAVKMI EKEV 479
PMH2 AARGLDVVPNVDLVIHYELPNNTEFVHRTGRTGRAGKKGSAILI YSQDSRAVKII EREV 467
***** * * * * * * * * * * * * * * * * * * * * * * * * * * * * * * * * * * * * * * * * *

PMH1 GSRFNEELPSIAVERGSASMFEGVGARSGGSFGG-----GRSGGGYG-SYGSSG 528
PMH2 GSRFTEELPSIAVERGSASMFEIGISRSGGSFGGMRDRGSSFGGRSGGGYGSGSSGYGG 527
**** * * * * * * * * * * * * * * * * * * * * * * * * * * * * * * * * * * * * * * * * *

PMH1 RSGGGSYGGYGSSGRSGGGGSGYGGSSSRYSGGSDRSSGFSGFGSGSS----- 581
PMH2 GRSGGSSNRYSGSDRSFGFSFGMRSPEGYGSDRSSQSGGRSSFGGGRSGGSSNRRSSGF 587
*** * * * * * * * * * * * * * * * * * * * * * * * * * * * * * * * * * * * * * * * * *

PMH1 GFGSDRSSQSSGRSSFGGFGSNDGKRSY 610
PMH2 GDFGSDRSSQSGGRSSFGGFGSNDGKRSY 616
* * * * * * * * * * * * * * * * * * * * * * * * * * * * * * * * * * * * * * * * *

```

Alignment of PMH1 (At3g22310) and PMH2 (At3g22330) amino acid sequences. Identical residues are indicated by stars. DEAD-box protein-specific motifs are boxed and numbered according Linder et al. (2006). The peptides used for immunization are given in grey boxes.
