# Supplementary material
Source: PubMed Central journal article supplement (PMC2151684)
Supplement: plntphys_pp.107.108076_2.pdf [file plntphys_pp.107.108076_2.pdf]

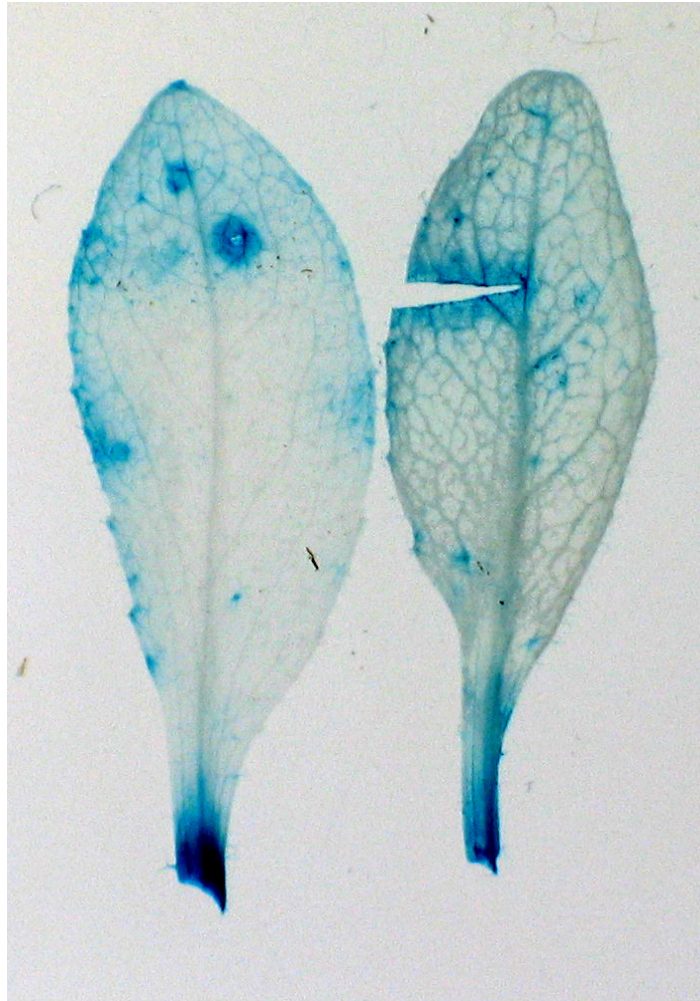

Wounding induces PMH2 promoter activity. Rosette leaves were wounded with a pin (left) and a scissor (right), removed from the plant and stained. Pronounced staining is seen at the wounding sites including the detachment site. Staining seems to be particularly intensive in vascular bundles.

**Matthes et al., Supplementary Figure 2**
